# Supplementary material for: Effects of Genetic Variation of the Sorting Nexin 29 (SNX29) Gene on Growth Traits of Xiangdong Black Goat
Source: MDPI journal article supplement (doi:10.3390/ani12243461), 2022-12-08
Supplement: s1 [file s1]

# Supplementary Table:

**Table S1.** The information of primers used in this study.

|            | Gene              | Primer sequences (5' to 3')                             | Tm(°C) | Product length (bp) |
|------------|-------------------|---------------------------------------------------------|--------|---------------------|
| DNA level  | <i>SNX29</i> -CNV | F:AGGTGACATCGGTGCTCAGTGT<br>R: GCCTGCTCCTGGAAGAGAATG    | 61     | 107                 |
|            | <i>MC1R</i>       | F: GGGCAGTCCCCTTGACAAAGA<br>R: ATCTCCCCAGCCTCCTCATT     | 58     | 129                 |
|            | Indel-17bp        | F: TGGGCACATACATTTTCAGGAC<br>R: AAGCTCCCAAAGTCAGGAACC   | 56     | 144                 |
|            | Indel-21bp        | F:GAGGAGATAAAGGGAGGGAGTC<br>R: AGAAAGGCAGGCAGGTAAGG     | 56     | 199                 |
| mRNA level | <i>SNX29</i>      | F: GAACCTGCTTGACGGCGAGATG<br>R: TCCTCCTGTTTCAGCCACCTTCC | 59     | 87                  |
|            | <i>GAPDH</i>      | F: AAAGTGGACATCGTCGCCAT<br>R: CCGTTCTCTGCCTTGACTGT      | 57     | 116                 |

**Table S2.** Genotypic and allelic frequencies and population indexes of *SNX29* gene in Xiangdong black goats.

| Loci  | Total | Genotypes | Genotypic frequencies | Allelic frequencies | HWE <i>P</i> values | Ho    | He    | Ne    | PIC   |
|-------|-------|-----------|-----------------------|---------------------|---------------------|-------|-------|-------|-------|
| 17bp- | 516   | II (360)  | 0.698                 | I (0.847)           | <i>P</i> >0.05      | 0.740 | 0.262 | 1.351 | 0.227 |
|       |       | ID (153)  | 0.297                 | D (0.155)           |                     |       |       |       |       |
|       |       | DD (3)    | 0.006                 |                     |                     |       |       |       |       |
| 21bp- | 516   | II (183)  | 0.355                 | I (0.565)           | <i>P</i> >0.05      | 0.509 | 0.493 | 1.964 | 0.371 |
|       |       | ID (216)  | 0.419                 | D (0.437)           |                     |       |       |       |       |
|       |       | DD (117)  | 0.227                 |                     |                     |       |       |       |       |

Note: II: homozygote insertion genotype; DD: homozygote deletion genotype; ID: heterozygote genotype; HWE: Hardy–Weinberg equilibrium; Ho: homozygosity; He: heterozygosity; Ne: effective allele numbers; PIC: polymorphism information content.

**Table S3.** Relationship between the indel loci within *SNX29* gene and growth traits in Xiangdong black goats.

| Loci  | Growth traits            | Observed genotypes (Mean ± SE) |            |            | <i>P</i> Values |
|-------|--------------------------|--------------------------------|------------|------------|-----------------|
|       |                          | II (n=360)                     | ID (n=153) | DD (n=3)   |                 |
| 17bp- | Body height (BH)         | 56.58±0.42                     | 56.04±0.66 | 60.00±2.00 | 0.412           |
|       | Body length (BL)         | 58.56±0.53                     | 59.12±0.71 | 61.50±0.50 | 0.641           |
|       | Body oblique length (OL) | 58.81±0.53                     | 59.82±0.71 | 60.5±2.50  | 0.493           |
|       | Chest                    | 73.71±0.71                     | 72.27±1.24 | 75.5±0.50  | 0.521           |

|       |                                    |                          |                         |                          |                 |
|-------|------------------------------------|--------------------------|-------------------------|--------------------------|-----------------|
|       | circumference<br>(CC)              |                          |                         |                          |                 |
|       | Abdominal<br>circumference<br>(AC) | 84.64±0.96               | 84.02±1.41              | 82.00±4.00               | 0.884           |
|       | Cross height<br>(CH)               | 57.50±0.43               | 57.14±0.50              | 59.00±0.00               | 0.777           |
|       | Cannon<br>Circumference<br>(CAC)   | 10.81±0.12               | 10.92±0.16              | 12.00±0.00               | 0.376           |
|       | <b>Growth traits</b>               | <b>II (n=183)</b>        | <b>ID (n=216)</b>       | <b>DD (n=117)</b>        | <b>P Values</b> |
| 21bp- | Body height (BH)                   | 56.56±0.58               | 56.44±0.61              | 56.36±0.64               | 0.985           |
|       | Body length (BL)                   | 58.78±0.75               | 58.73±0.65              | 58.72±0.84               | 0.98            |
|       | Body oblique<br>length (OL)        | 59.81±0.69               | 58.84±0.67              | 58.64±0.77               | 0.476           |
|       | Chest<br>circumference<br>(CC)     | 73.48±1.07               | 72.8±0.94               | 73.77±1.30               | 0.818           |
|       | Abdominal<br>circumference<br>(AC) | 85.38±1.42               | 83.27±1.19              | 84.85±1.56               | 0.496           |
|       | Cross height<br>(CH)               | 57.47±0.53               | 56.94±0.59              | 58.08±0.57               | 0.414           |
|       | Cannon<br>Circumference<br>(CAC)   | 10.91±0.17 <sup>ab</sup> | 10.73±0.15 <sup>b</sup> | 10.95±0.17 <sup>ab</sup> | 0.626           |

Note: Data were shown as mean ± SE.
